# Supplementary material for: Synthesis of photocatalytic pore size-tuned ZnO molecular foams
Source: Royal Society of Chemistry journal article supplement (doi:10.1039/d2ta02038f), 2022-01-01
Supplement: d2ta02038f1.pdf [file d2ta02038f1.pdf]

**Supplementary Information for**

**Synthesis of Photocatalytic Pore Size-Tuned ZnO Molecular Foams**

Zachary Warren,<sup>a</sup> Thais Tasso Guaraldo,<sup>a</sup> Jannis Wenk<sup>a</sup> and Davide Mattia\*<sup>a</sup>

Table S1: Table of conditions investigated in research for MolFoam production

| Parameter            | Initial condition                                                 | Preliminary findings                                                                                                                                                                                                                                                                                               | Final condition                                                           |
|----------------------|-------------------------------------------------------------------|--------------------------------------------------------------------------------------------------------------------------------------------------------------------------------------------------------------------------------------------------------------------------------------------------------------------|---------------------------------------------------------------------------|
| Zinc source.         | Zn(Ac) <sub>2</sub> used as Zn salt.                              | Issues of solubility and basicity lead to structurally weak foams.                                                                                                                                                                                                                                                 | Zn (AcAc) <sub>2</sub> selected as alternative Zn salt.                   |
| Use of surfactant    | No surfactant used.                                               | Foams shorter than reported here, very little porosity seen in MicroCT.                                                                                                                                                                                                                                            | CTAB 5mM added to solution.                                               |
| Flow rate of air     | 0.5 sL min <sup>-1</sup>                                          | Higher flow rates of air (0.5-, 0.25- sL min <sup>-1</sup> ) lead to faster evaporation of EtOH causing poor gelling and fragile foams.                                                                                                                                                                            | 0.1 sL min <sup>-1</sup>                                                  |
| Calcination step     | Foams calcined at 500 °C for 3 hours prior to sintering.          | Calcining to remove organics unnecessary due to sintering and additional heating/cooling cycle leads to weaker foams                                                                                                                                                                                               | Calcination step removed, 12 hours sintering step only.                   |
| Sintering time       | 12, 15, 18, 20 hours sintering                                    | Batch degradation experiments showed 20 hours sintering at 900 °C lead to greatest photocatalytic activity                                                                                                                                                                                                         | 900 °C ,20-hour sintering step                                            |
| Sintering profile    | Single step sintering process                                     | Foams unsuitable for use within recirculating reactor.                                                                                                                                                                                                                                                             | Two step sintering condition adopted 1,000 °C ,0.5-hour + 900 °C ,20-hour |
| Sintering parameters | Two step sintering condition 1,000 °C ,0.5-hour + 900 °C ,20-hour | Multiple conditions (1,000 °C ,1 -hour + 900 °C ,20-hour / 950 °C ,0.5 - hour + 900 °C ,20-hour/ 950 °C ,1.0 - hour + 900 °C ,20-hour) analysed using degradation experiments, No significant change in degradation results, but original sintering conditions resulted in larger, more mechanically stable foams. | Two step sintering condition adopted 1,000 °C ,0.5-hour + 900 °C ,20-hour |

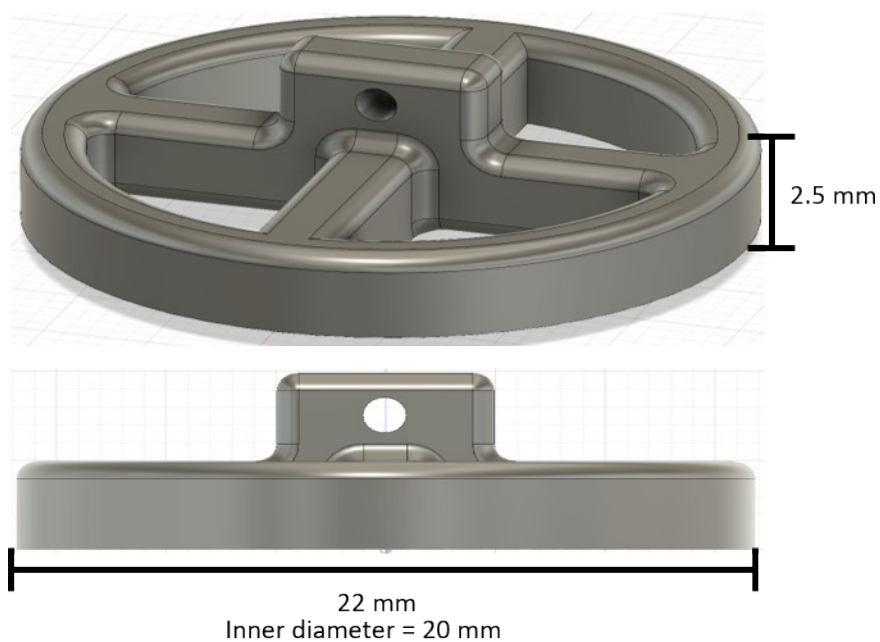

Figure S1: 3D model of printed buffer included inside reactor cartridges.

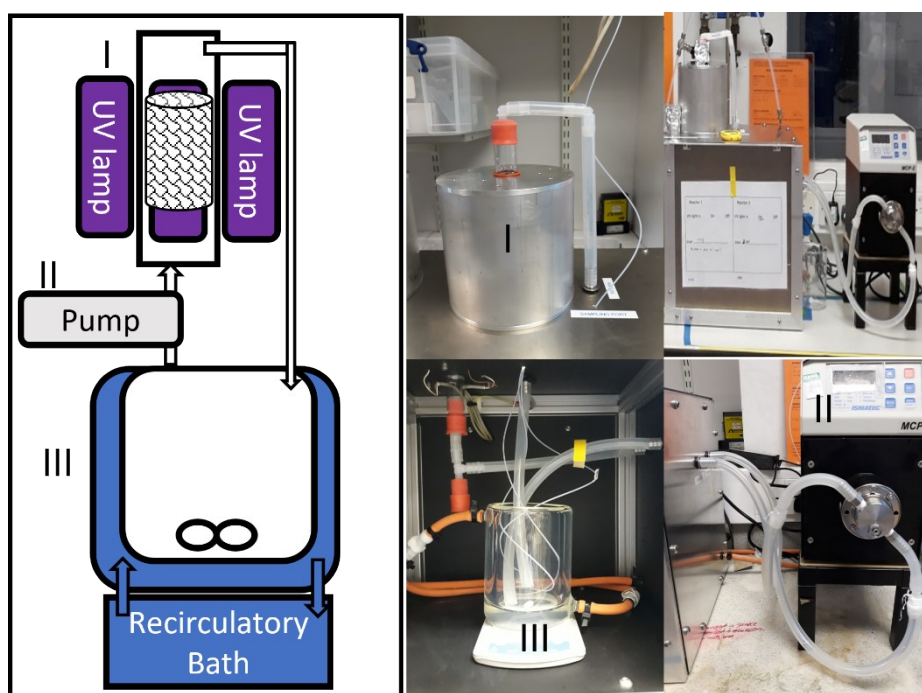

Figure S2: Schematic diagrams for recirculating photocatalytic reactors. Labelled are I) quartz tube containing foam surrounded by UV lamps, II) gear pump Ismatec, MCP-Z with a pump head Model GBS.P23.JVS.A-B1 and III) reservoir 500 mL)

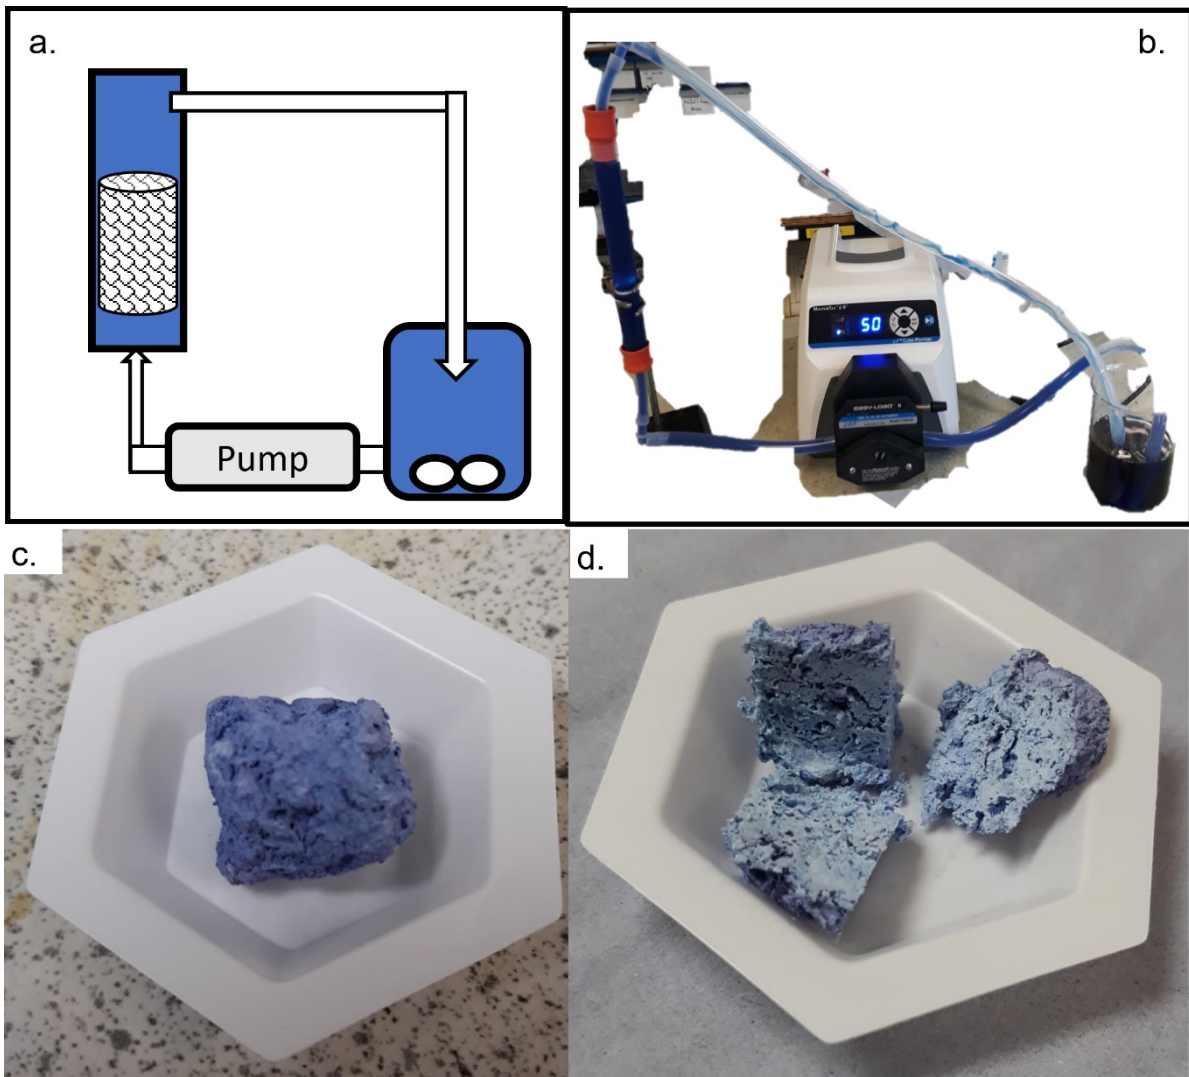

Figure S3: a) schematic diagram of bespoke dyeing rig to test dye uptake into MolFoam pores. b) photograph of dyeing rig in operation. c, d) A dyed MolFoam before and after being cut open.

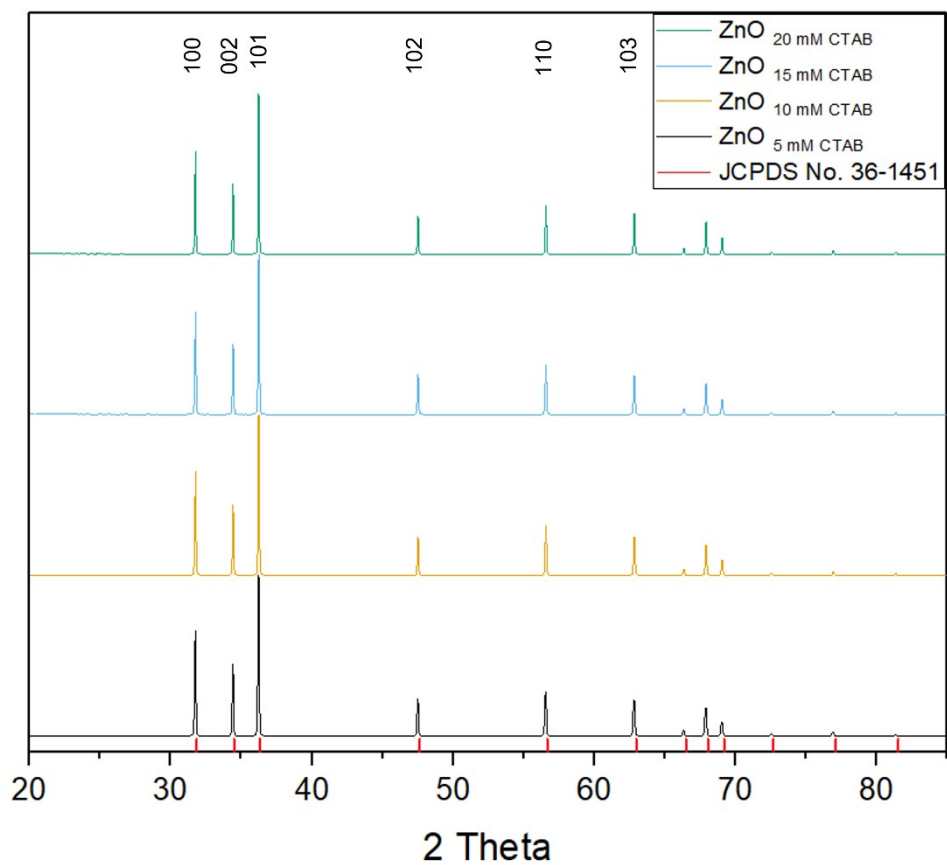

Figure S4: XRD pattern of ZnO MolFoams synthesised using different CTAB concentrations. Tick marks correspond to peaks reported from JCPDS No. 36-1451 <sup>1</sup>

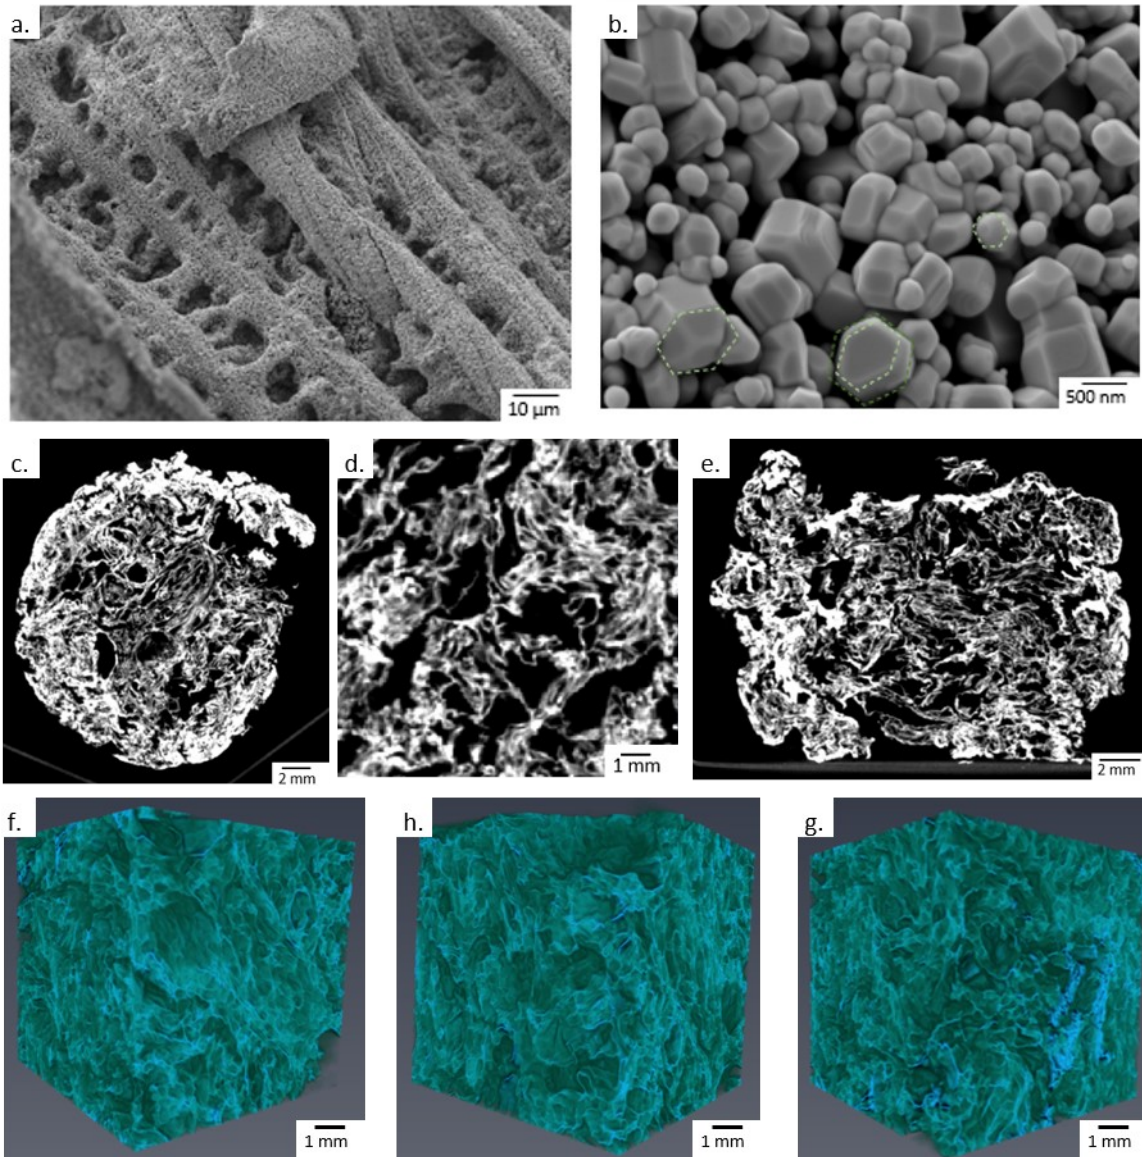

Figure S5 Various characterisations of ZnO MolFoams synthesised using 5 mM CTAB solutions a,b) FESEM c-e) MicroCT slices and f-g) 3D reconstructions based on MicroCT.



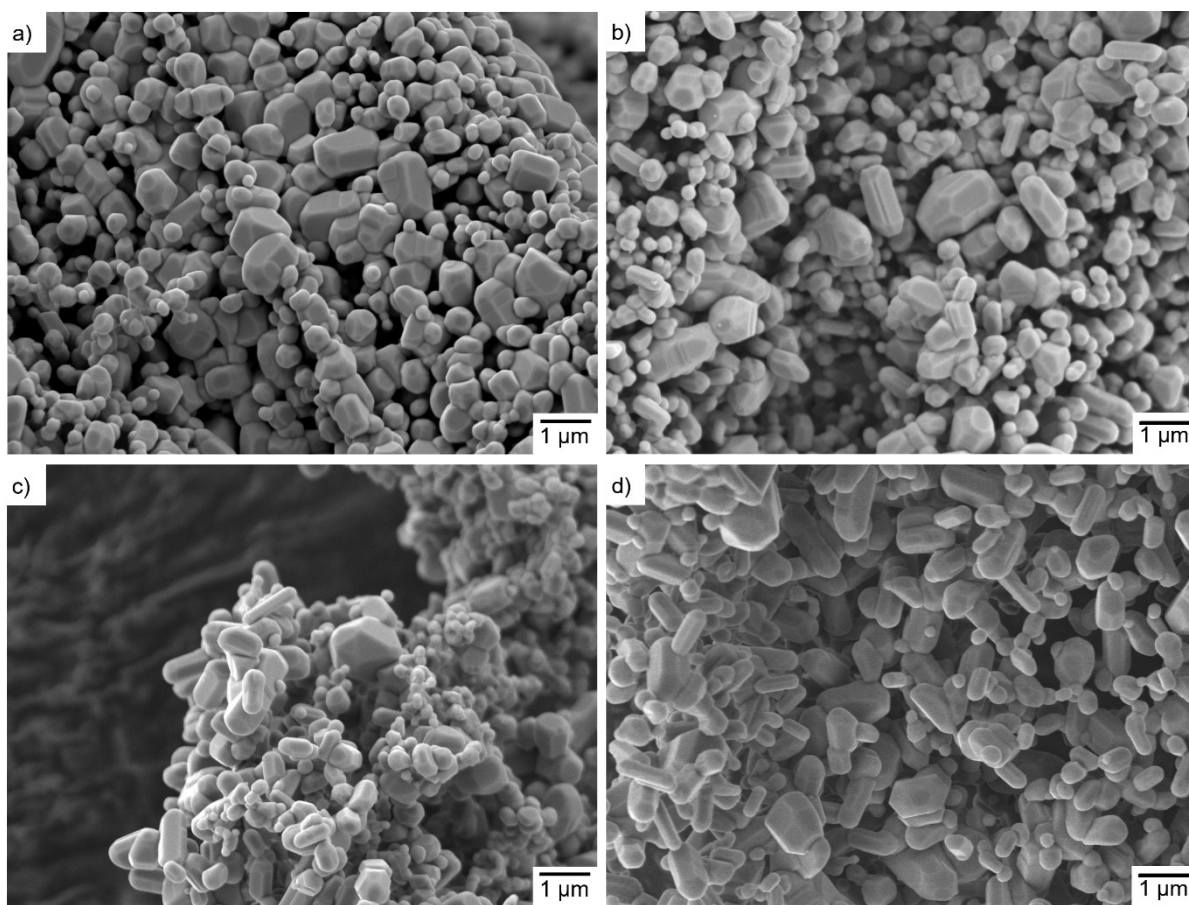

Figure S6: FE-SEM micrographs of ZnO MolFoams synthesised using a) 5mM, b) 10 mM, c) 15 mM and d) 20 mM CTAB solutions.

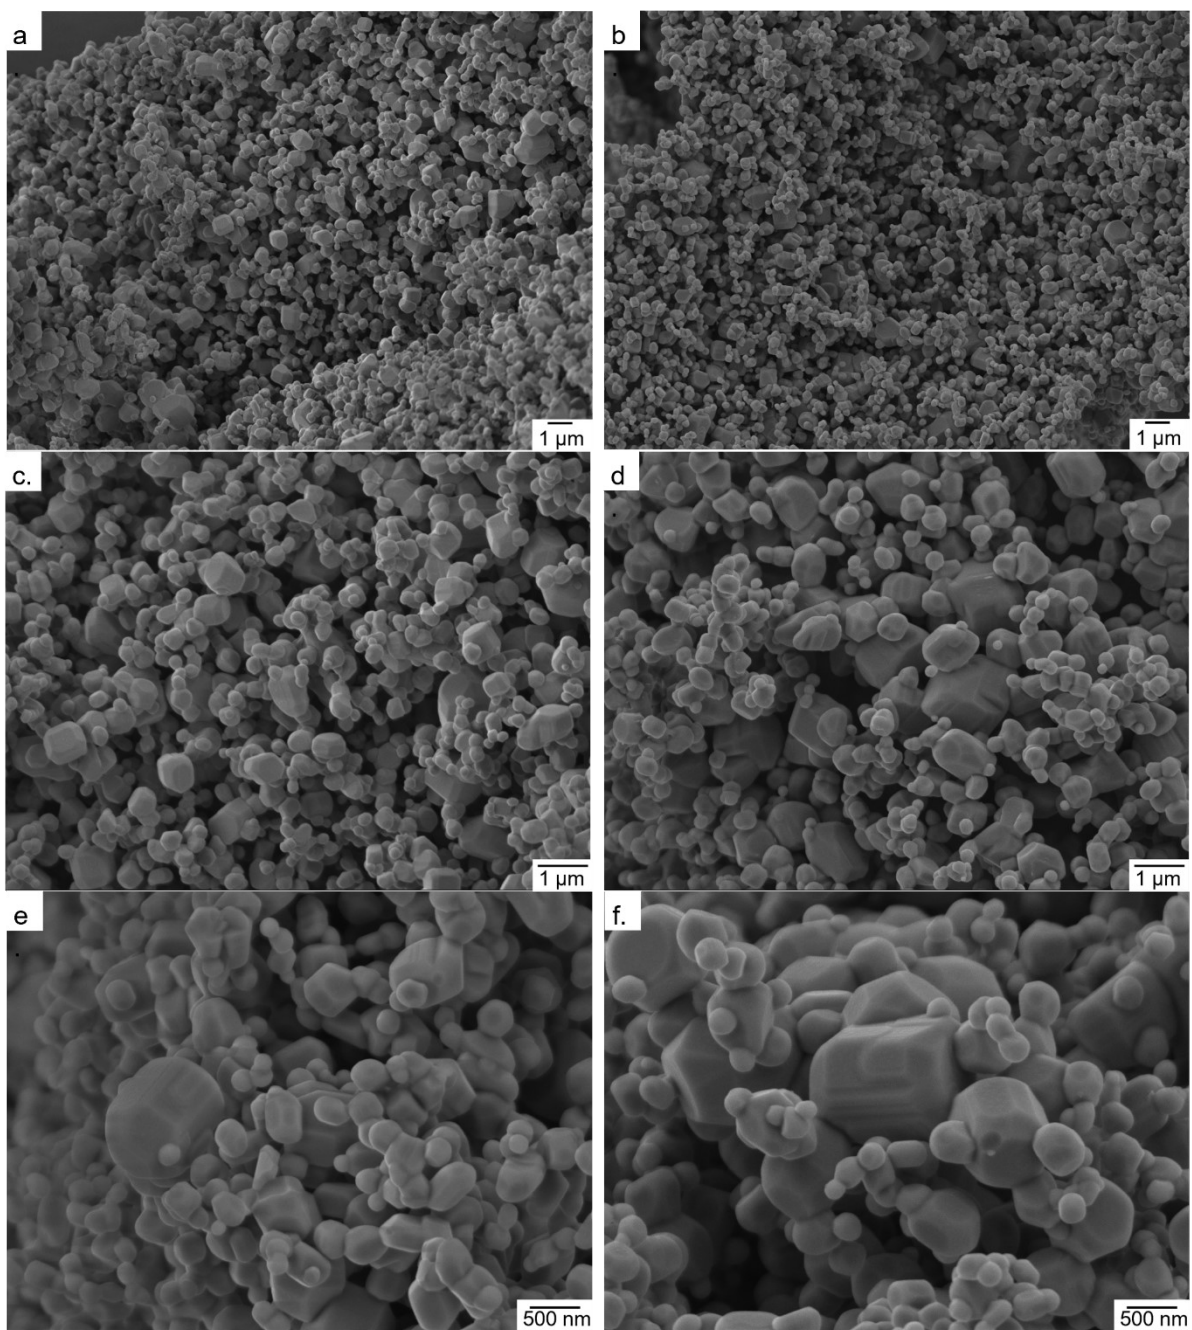

Figure S7: FE-SEM micrographs of ZnO MolFoams(a, c,e) before and (b,d,f) after application within reactor for photocatalytic CBZ degradation



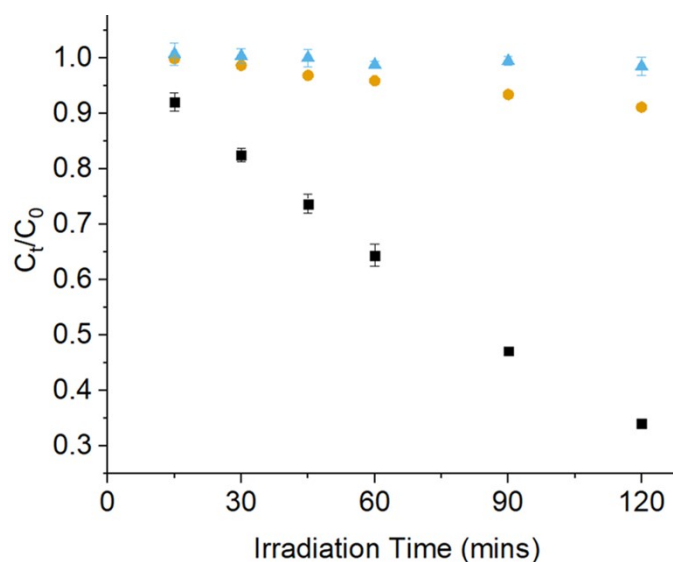

Figure S8: Removal of CBZ using MolFoams synthesised using 10 mM CTAB within a recirculating reactor operated at flow rate of  $250 \text{ mL min}^{-1}$  [■ Photocatalysis, ● Photolysis, ▽ Adsorption].

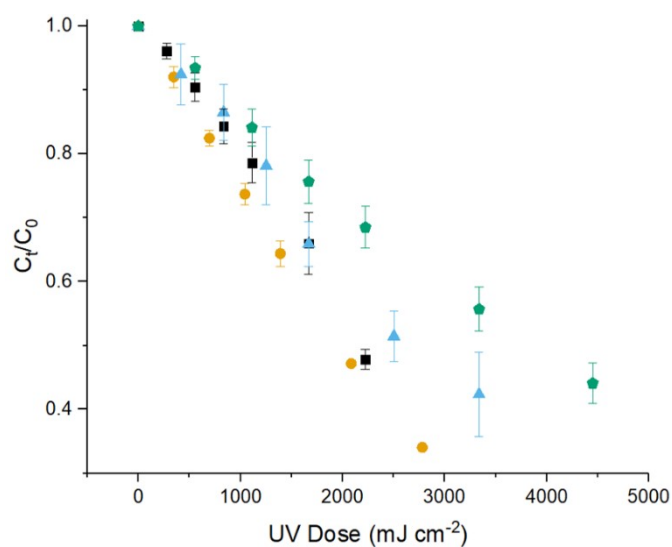

Figure S9: Photocatalytic degradation of CBZ using MolFoams synthesised using 10 mM CTAB within a recirculating reactor operated at various flow rates [■  $200 \text{ mL min}^{-1}$ , ●  $250 \text{ mL min}^{-1}$ , ▽  $300 \text{ mL min}^{-1}$ , ◉  $400 \text{ mL min}^{-1}$ ].

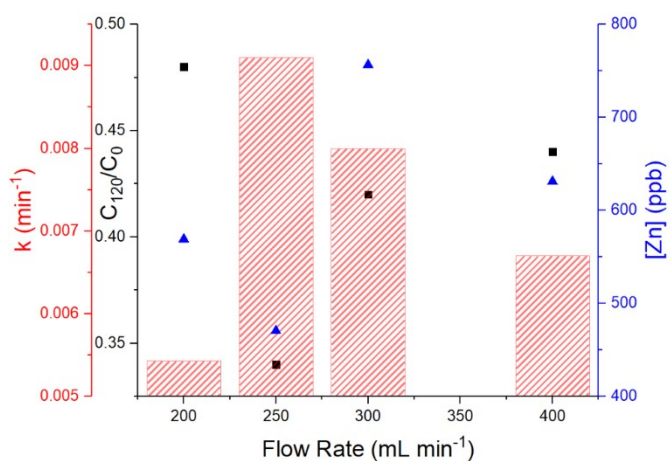

Figure S10: Comparison between ■ photocatalytic CBZ degradation after 120 mins, pseudo first order reaction kinetics (bar) and ▽ zinc concentration post PCA of MolFoam reactors operating at various flow rates.

## Text S1. UV dose and quantum yield calculations

Within a recirculating reactor, the entire solution volume is not irradiated at any one time as with a batch reactor. The UV dose was calculated in equation S1 and the light attenuation calculated as shown in equation S2.<sup>2</sup>

$$UV\ Dose\ [mJ\ cm^{-2}] = Irradiation\ time\ [s] * I_{0\lambda} * (\tau * \frac{V_r}{V_0})\ [mW\ cm^{-2}] \quad (S1)$$

$$I_{\alpha\lambda} = I_{0\lambda}(1 - 10^{((\epsilon_{H_2O} * [H_2O] + \epsilon_{CBZ} * [CBZ])L)}) \quad (S2)$$

Where  $I_{0\lambda}$  is the incident light emitted by the UV lamps ( $mW\ cm^{-2}$ ),  $\tau$  is total residence time within the foam (s),  $V_r$  is the volume receiving UV dose within the foam per second ( $mL\ s^{-1}$ ) and  $V_0$  is the total volume of the reservoir (mL).

The measured light intensity was  $10.4\ mW\ cm^{-2}$ ,  $\tau$  was 4.5 seconds,  $V_r$  was dependent of flow rate and tabulated below, and  $V_0$  was 500 mL. These conditions are exclusive to wavelengths of 254 nm only.

Table S2: Tabulation of  $V_r$  for corresponding flow rates.

| Flowrate<br>( $mL\ min^{-1}$ ) | Volume of liquid exposed to<br>UV within the foam per<br>second ( $mL\ s^{-1}$ ) |
|--------------------------------|----------------------------------------------------------------------------------|
| 100                            | 1.67                                                                             |
| 200                            | 3.33                                                                             |
| 300                            | 5.00                                                                             |
| 400                            | 6.67                                                                             |
| 500                            | 8.33                                                                             |

Table S3: Tabulation of UV dose for recirculating reactors at various flow rates.

| Time<br>(s) | UV Dose<br>( $100\ mL\ min^{-1}$ )<br>( $mJ\ cm^{-2}$ ) | UV Dose<br>( $200\ mL\ min^{-1}$ )<br>( $mJ\ cm^{-2}$ ) | UV Dose<br>( $250\ mL\ min^{-1}$ )<br>( $mJ\ cm^{-2}$ ) | UV Dose<br>( $300\ mL\ min^{-1}$ )<br>( $mJ\ cm^{-2}$ ) | UV Dose<br>( $400\ mL\ min^{-1}$ )<br>( $mJ\ cm^{-2}$ ) | UV Dose<br>( $500\ mL\ min^{-1}$ )<br>( $mJ\ cm^{-2}$ ) |
|-------------|---------------------------------------------------------|---------------------------------------------------------|---------------------------------------------------------|---------------------------------------------------------|---------------------------------------------------------|---------------------------------------------------------|
| 0           | 0                                                       | 0                                                       | 0                                                       | 0                                                       | 0                                                       | 0                                                       |
| 900         | 139                                                     | 278                                                     | 348                                                     | 417                                                     | 556                                                     | 695                                                     |
| 1800        | 278                                                     | 556                                                     | 695                                                     | 834                                                     | 1112                                                    | 1391                                                    |
| 2700        | 417                                                     | 834                                                     | 1043                                                    | 1251                                                    | 1669                                                    | 2086                                                    |
| 3600        | 556                                                     | 1112                                                    | 1391                                                    | 1669                                                    | 2225                                                    | 2781                                                    |
| 5400        | 834                                                     | 1669                                                    | 2086                                                    | 2503                                                    | 3337                                                    | 4172                                                    |
| 7200        | 1112                                                    | 2225                                                    | 2781                                                    | 3337                                                    | 4450                                                    | 5562                                                    |

The calculations for the quantum yield are based on the energy and photon flux of the system.<sup>3</sup>

Planck's equation was used to convert the energy value of the lamps into photon flux, Equation S3.

$$E_p = \frac{h * c}{\lambda} \quad (S3)$$

Where  $h$  is Planck's constant ( $6.626 \times 10^{-34}$  J s),  $c$  is the speed of light ( $2.998 \times 10^8$  m s<sup>-1</sup>) and  $\lambda$  is the wavelength of light (m) from the lamps used in these experiments. Considering the wavelength of 254 nm ( $2.54 \times 10^{-7}$  m) from the light source in this study, the calculated energy was  $7.82 \times 10^{-19}$  J.

Using this, the number of photons can be calculated using Equation S4.

$$N_p = \frac{E}{E_p} \quad (S4)$$

Where  $E_p$  was calculated previously,  $E$  is the incident light intensity with attenuation ( $W\ m^{-2}$ ). The number of photons was calculated to be  $1.32 \times 10^{20}$  ( $m^{-2}\ s^{-1}$ ).

The photon flux can be determined as the ratio of number of photons ( $N_p$ , see above) and Avogadro's number ( $6.02 \times 10^{23}$  mol<sup>-1</sup>) The photon flux, calculated using Equation S5 was  $2.19 \times 10^{-4}$  mol m<sup>-2</sup> s<sup>-1</sup>.

$$E_{qf} = \frac{N_p}{N_A} \quad (S5)$$

### Text S2. Photocatalytic reactor energy consumption calculations.

To assess the viability of scaling up of the system, the energy consumption of the reactor was accounted for by using the electrical energy per order ( $E_{EO}$ ), defined as the kilowatt hours of electrical energy needed to decrease the concentration of a pollutant by an order of magnitude (90%) in one cubic metre of solution: <sup>4</sup>

$$E_{EO} = \frac{P * t * 1,000}{V(\log \frac{C_0}{C_t})} \quad (S6)$$

Where:  $P$  is the total power output of the 3 lamps onto the 12 cm long quartz tube (kW),  $t$  is the irradiation time (hrs)  $V$  is the volume of reservoir (L) and  $C_0$  and  $C_t$  are the initial and final concentrations of pollutants respectively. As the foam occupied only a fraction of the quartz tube, the total power of the lamps, which act on the whole quartz tube, was multiplied by the volumetric fraction occupied by the foam (i.e. foam volume/quartz tube volume), to provide the effective power used for photocatalysis, considering that the contribution of photolysis is negligible. This is rendered necessary by the recirculating nature of the reactor, unlike a simple batch reactor, where the entire reservoir would be irradiated. In the present work, the external diameter of the foam corresponds to the internal diameter of the tube, so that the volumetric fraction is equivalent to the ratio of the foam's length to the total length of the quartz tube: 2 cm/12 cm = 0.17.

For the recirculating MolFoam reactors, three 5 W lamps were used, giving a  $P$  value of  $15 \times 10^{-3}$  kW, irradiation time was 120 minutes, volume of solution was 0.5 L, and the volumetric fraction 0.17.

Table S4: Degradation, pseudo-first order kinetics, quantum yield and  $E_{EO}$  data for MolFoams synthesised using 5 mM CTAB

| Flow Rate (mL min <sup>-1</sup> ) | $C_{120}/C_0$ | $k$ ( $\times 10^{-3}$ ) (min <sup>-1</sup> ) | $\Phi_{Overall}$ | $E_{EO}$ (KWh m <sup>-3</sup> ) |
|-----------------------------------|---------------|-----------------------------------------------|------------------|---------------------------------|
| 100                               | 0.64          | 4.18                                          | 0.32             | 49.84                           |
| 200                               | 0.54          | 4.45                                          | 0.34             | 39.71                           |

|     |      |      |      |       |
|-----|------|------|------|-------|
| 300 | 0.54 | 5.77 | 0.44 | 37.37 |
| 400 | 0.43 | 6.24 | 0.48 | 27.28 |

Table S5: Degradation, pseudo-first order kinetics, quantum yield, zinc concentration and  $E_{EO}$  data for MolFoams synthesised using 10 mM CTAB

| Flow Rate /mL min <sup>-1</sup> | $C_{120}/C_0$ | $k$ ( $\times 10^{-3}$ ) /min <sup>-1</sup> | $\Phi_{Overall}$ | [Zn] [ppb] | $E_{EO}$ /KWh m <sup>-3</sup> order <sup>-1</sup> |
|---------------------------------|---------------|---------------------------------------------|------------------|------------|---------------------------------------------------|
| 200                             | 0.48 ± 0.02   | 5.43 ± 0.36                                 | 0.41             | 569        | 31.37 ± 1.85                                      |
| 250                             | 0.34 ± 0.01   | 9.08 ± 0.44                                 | 0.69             | 471        | 21.34 ± 0.59                                      |
| 300                             | 0.42 ± 0.06   | 8.01 ± 0.41                                 | 0.61             | 757        | 26.54 ± 4.83                                      |
| 400                             | 0.44 ± 0.03   | 6.74 ± 0.12                                 | 0.51             | 631        | 28.05 ± 2.45                                      |

### Text S3. Hydrodynamics calculations.

Table S6: Hydrodynamic data and calculations for 5 mM CTAB foams

| flow rate<br>(mL min <sup>-1</sup> ) | flow rate<br>(m <sup>3</sup> s <sup>-1</sup> ) | flow velocity<br>(m s <sup>-1</sup> ) | $Re_{Dh}$ | Pe    | Sc                   | Sh |
|--------------------------------------|------------------------------------------------|---------------------------------------|-----------|-------|----------------------|----|
| 100                                  | 1.67×10 <sup>-6</sup>                          | 4.39×10 <sup>-3</sup>                 | 3         | 4913  | 1.75×10 <sup>3</sup> | 5  |
| 200                                  | 3.33×10 <sup>-6</sup>                          | 8.77×10 <sup>-3</sup>                 | 5         | 9826  |                      | 7  |
| 250                                  | 4.17×10 <sup>-6</sup>                          | 1.10×10 <sup>-2</sup>                 | 7         | 12283 |                      | 8  |
| 300                                  | 5.00×10 <sup>-6</sup>                          | 1.32×10 <sup>-2</sup>                 | 8         | 14739 |                      | 9  |
| 400                                  | 6.67×10 <sup>-6</sup>                          | 1.75×10 <sup>-2</sup>                 | 11        | 19652 |                      | 11 |
| 500                                  | 8.33×10 <sup>-6</sup>                          | 2.19×10 <sup>-2</sup>                 | 15        | 24565 |                      | 12 |

Table S7: Hydrodynamic data and calculations for 10 mM CTAB foams

| flow rate<br>(mL min <sup>-1</sup> ) | flow rate<br>(m <sup>3</sup> s <sup>-1</sup> ) | flow velocity<br>(m s <sup>-1</sup> ) | $Re_{Dh}$ | Pe    | Sc                   | Sh |
|--------------------------------------|------------------------------------------------|---------------------------------------|-----------|-------|----------------------|----|
| 100                                  | 1.67×10 <sup>-6</sup>                          | 4.39×10 <sup>-3</sup>                 | 2         | 4036  | 1.75×10 <sup>3</sup> | 4  |
| 200                                  | 3.33×10 <sup>-6</sup>                          | 8.77×10 <sup>-3</sup>                 | 4         | 8071  |                      | 6  |
| 250                                  | 4.17×10 <sup>-6</sup>                          | 1.10×10 <sup>-2</sup>                 | 5         | 10089 |                      | 7  |
| 300                                  | 5.00×10 <sup>-6</sup>                          | 1.32×10 <sup>-2</sup>                 | 7         | 12107 |                      | 7  |
| 400                                  | 6.67×10 <sup>-6</sup>                          | 1.75×10 <sup>-2</sup>                 | 9         | 16143 |                      | 9  |
| 500                                  | 8.33×10 <sup>-6</sup>                          | 2.19×10 <sup>-2</sup>                 | 12        | 20179 |                      | 10 |

$$Re_D = \frac{\rho Q D_p}{\mu A \varepsilon} \quad (S7)$$

$$Pe = \frac{u D_p}{D} \quad (S8)$$

$$Sc = \frac{\mu}{\rho D} \quad (S9)$$

$$Sh = 1.029 * Sc^{0.33} * Re_{Dh}^{0.55} * \left(\frac{L}{D_p}\right)^{-0.472} \quad (S10)$$

Where Q is the volumetric flow rate of the fluid,  $D_p$  is the macropore size of the foams,  $\mu$  is the dynamic viscosity of the fluid, A is the cross-sectional area of the foam,  $\epsilon$  is the porosity of the foam, u is the mean velocity of the fluid, D is the diffusion coefficient of Carbamazepine, <sup>5, 6</sup>  $\rho$  is the density of the fluid and L is the length of the foam. Re, Pe, Sc and Sh are the dimensionless numbers, Reynolds, Peclet, Schmidt and Sherwood.

Reynolds number for the foam system (Eq S7) was calculated as reported by Mohsen Karimian et al. <sup>7</sup>

#### Text S4. Comparison with literature.

Table S8: CBZ photocatalytic degradation kinetics for slurries and immobilised systems reported from literature.

| Material                                                                   | Photocatalyst                                                                                                                             | Degradation conditions                                                                                                                                       | [CBZ] <sub>0</sub>      | Kinetics                 | Eeo      | QY     | Ref       |
|----------------------------------------------------------------------------|-------------------------------------------------------------------------------------------------------------------------------------------|--------------------------------------------------------------------------------------------------------------------------------------------------------------|-------------------------|--------------------------|----------|--------|-----------|
| ZnO                                                                        | 0.1 g L <sup>-1</sup><br>NP suspension                                                                                                    | Batch reactor<br>100 mL volume<br>Temperature: 25 °C<br>Xenon Lamp,<br>(5 KW, 5.5 W cm <sup>-2</sup> , 6000 K, 483 nm)                                       | 50 mg L <sup>-1</sup>   | 3.7 X 10 <sup>-3</sup>   | 46.48    | 0.0003 | 8         |
| ZnFe <sub>2</sub> O <sub>4</sub>                                           |                                                                                                                                           |                                                                                                                                                              |                         | 36.7 X 10 <sup>-3</sup>  | 4.69     | 0.0020 |           |
| TiO <sub>2</sub>                                                           | 1.0 g L <sup>-1</sup><br>NP suspension                                                                                                    | Batch reactor<br>60 mL volume<br>LED lamp ( $\lambda_{max}$ 417 nm, 450 W cm <sup>-2</sup> )                                                                 | 0.75 mg L <sup>-1</sup> | 4.7 X 10 <sup>-3</sup>   |          | 0.0050 | 9         |
| g-C <sub>3</sub> N <sub>4</sub>                                            |                                                                                                                                           |                                                                                                                                                              |                         | 566.8 X 10 <sup>-3</sup> |          | 0.60   |           |
| g-C <sub>3</sub> N <sub>4</sub> /TiO <sub>2</sub> composites               | 1.0 g L <sup>-1</sup><br>NP suspension                                                                                                    | Batch reactor<br>100 mL volume<br>LED lamp (50 W, 475 nm)                                                                                                    | 10.0 mg L <sup>-1</sup> | 5.5 X 10 <sup>-3</sup>   | 187.09   |        | 10        |
| N-doped TiO <sub>2</sub> -SiO <sub>2</sub> -Fe <sub>3</sub> O <sub>4</sub> | 1.0 g L <sup>-1</sup><br>NP suspension                                                                                                    | Batch reactor<br>250 mL reactor<br>Compact fluorescent lamp (9 W, 320 $\mu$ W cm <sup>-2</sup> , 365 nm)                                                     | 2.0 mg L <sup>-1</sup>  | 2.2 X 10 <sup>-3</sup>   | 188.24   |        | 11        |
| TiO <sub>2</sub>                                                           | 57 mg L <sup>-1</sup><br>NP supported on<br>PVDF dual layer<br>hollow<br>fibre membrane                                                   | Recirculating reactor, flow rate 100 mL min <sup>-1</sup> , 500 mL volume<br>Hg lamp (40 W, 45.0 W cm <sup>-2</sup> , 254 nm)                                | 0.4 mg L <sup>-1</sup>  | 22.1 X 10 <sup>-3</sup>  | 153.00   | 0.39   | 12        |
| TiO <sub>2</sub>                                                           | P25 commercial NPs<br>dispersed in MeOH<br>before electrospray<br>onto steel mesh<br>(2.5- X 5.0 cm)                                      | Batch reactor<br>50 mL volume<br>Six 4-W blacklight<br>blue lamps (4 W, Sankyo Denki<br>F10T8, Japan) 365 nm                                                 | 2.4 mg L <sup>-1</sup>  | 32.2 X 10 <sup>-3</sup>  | 395.48   |        | 13        |
| TiO <sub>2</sub>                                                           | TiO <sub>2</sub> films obtained<br>through plasma<br>electrolytic oxidation<br>of Ti meshes<br>(geometric area<br>327.5 cm <sup>2</sup> ) | Batch reactor<br>1,000 mL volume<br>Lamp (30 W low-pressure Hg vapor<br>UV-C, 254 nm.)                                                                       | 0.1 mg L <sup>-1</sup>  | 17.9 X 10 <sup>-3</sup>  | 37.01    |        | 14        |
| TiO <sub>2</sub>                                                           | 0.5 g L <sup>-1</sup><br>NP suspension (P25)                                                                                              | Recirculating reactor, flow rate 83.3 mL min <sup>-1</sup> , 1,000 mL volume<br>A blacklight-blue lamp (HQPower<br>Lamp15TBL,<br>nominal power 15 W, 365 nm) | 5.0 mg L <sup>-1</sup>  | 23.4 X 10 <sup>-3</sup>  | 4.05     |        | 15        |
| TiO <sub>2</sub>                                                           | TiO <sub>2</sub> drop coated<br>onto $\alpha$ -Al <sub>2</sub> O <sub>3</sub><br>microfiltration<br>membranes                             | Flow photocatalytic membrane<br>reactor<br>Volume 200 mL<br>Xenon lamp(300 W, 76.7 mW cm <sup>-2</sup> )                                                     | 1.0 mg L <sup>-1</sup>  | 4.0 X 10 <sup>-3</sup>   | 2994.01  | 0.02   | 16        |
| TiO <sub>2</sub>                                                           | 1.0 g L <sup>-1</sup><br>NP suspension                                                                                                    | Batch reactor<br>50 mL volume<br>Hg Lamps (6 X 8 W, 1.6mW cm <sup>-2</sup> , 365 nm)                                                                         | 12.0 mg L <sup>-1</sup> | 15.4 X 10 <sup>-3</sup>  | 191.01   | 0.25   | 17        |
| ZnO                                                                        |                                                                                                                                           |                                                                                                                                                              |                         | 30.1 X 10 <sup>-3</sup>  | 624.49   | 0.49   |           |
| C- TiO <sub>2</sub>                                                        | 0.1 g L <sup>-1</sup><br>NP suspension                                                                                                    | Batch reactor<br>400 mL volume<br>Tungsten lamp (150 W, 6.3mW cm <sup>-2</sup> , 400 nm)                                                                     | 0.05 mg L <sup>-1</sup> | 2.3 X 10 <sup>-3</sup>   | 166.39   | 0.18   | 18        |
| TiO <sub>2</sub>                                                           | 12.5 g L <sup>-1</sup><br>NP supported on<br>sand                                                                                         | Batch reactor<br>500 mL volume<br>Xe high intensity lamp (55 W, 1.26 mW cm <sup>-2</sup> , 475 nm)                                                           | 5 mg L <sup>-1</sup>    | 0.5 X 10 <sup>-3</sup>   | 12902.72 | 0.17   | 19        |
| ZnO                                                                        | 1.5 g L <sup>-1</sup> foam                                                                                                                | Recirculating reactor, flow rate 250 mL min <sup>-1</sup> , 500 mL volume<br>Lamps (3 X 5 W, 10.3 mW cm <sup>-2</sup> , 254 nm)                              | 2.4 mg L <sup>-1</sup>  | 9.1 X 10 <sup>-3</sup>   | 21.34    | 0.69   | This work |



## References

1. R. Boppella, K. Anjaneyulu, P. Basak and S. V. Manorama, *The Journal of Physical Chemistry C*, 2013, **117**, 4597-4605.
2. C. M. Taylor, A. Ramirez-Canon, J. Wenk and D. Mattia, *J Hazard Mater*, 2019, **378**, 120799.
3. S. W. da Silva, J. P. Bortolozzi, E. D. Banús, A. M. Bernardes and M. A. Ulla, *Chemical Engineering Journal*, 2016, **283**, 1264-1272.
4. J. R. Bolton, K. G. Bircher, W. Tumas and C. A. Tolman, *Pure and Applied Chemistry*, 2001, **73**, 627-637.
5. J. R. Crison, V. P. Shah, J. P. Skelly and G. L. Amidon, *J Pharm Sci*, 1996, **85**, 1005-1011.
6. Y. Lu and M. Li, *J Pharm Sci*, 2016, **105**, 131-138.
7. S. A. M. Karimian and A. G. Straatman, *International Journal of Heat and Fluid Flow*, 2008, **29**, 292-305.
8. H. Mohan, V. Ramalingam, A. Adithan, K. Natesan, K. K. Seralathan and T. Shin, *J Hazard Mater*, 2021, **416**, 126209.
9. N. F. F. Moreira, M. J. Sampaio, A. R. Ribeiro, C. G. Silva, J. L. Faria and A. M. T. Silva, *Applied Catalysis B: Environmental*, 2019, **248**, 184-192.
10. Z. Hu, X. Cai, Z. Wang, S. Li, Z. Wang and X. Xie, *J Hazard Mater*, 2019, **380**, 120812.
11. A. Kumar, M. Khan, L. Fang and I. M. C. Lo, *J Hazard Mater*, 2019, **370**, 108-116.
12. L. Paredes, S. Murgolo, H. Dzinun, M. H. Dzarfan Othman, A. F. Ismail, M. Carballa and G. Mascolo, *Applied Catalysis B: Environmental*, 2019, **240**, 9-18.
13. S. Ramasundaram, M. G. Seid, H. E. Kim, A. Son, C. Lee, E. J. Kim and S. W. Hong, *J Hazard Mater*, 2018, **360**, 62-70.
14. S. Murgolo, S. Franz, H. Arab, M. Bestetti, E. Falletta and G. Mascolo, *Water Res*, 2019, **164**, 114920.
15. E. Mena, A. Rey and F. J. Beltrán, *Chemical Engineering Journal*, 2018, **339**, 369-380.
16. I. Horovitz, D. Avisar, M. A. Baker, R. Grilli, L. Lozzi, D. Di Camillo and H. Mamane, *J Hazard Mater*, 2016, **310**, 98-107.
17. S. Teixeira, R. Gurke, H. Eckert, K. Kühn, J. Fauler and G. Cuniberti, *Journal of Environmental Chemical Engineering*, 2016, **4**, 287-292.
18. A. Surejan, B. Sambandam, T. Pradeep and L. Philip, *Journal of Environmental Chemical Engineering*, 2017, **5**, 757-767.
19. Y. He, N. B. Sutton, H. H. H. Rijnaarts and A. A. M. Langenhoff, *Applied Catalysis B: Environmental*, 2016, **182**, 132-141.
